# Supplementary material for: Cerebral Blood Flow, Autoregulation and Vascular Reactivity in Normal Pressure Hydrocephalus: a systematic review
Source: Research Square preprint supplement (doi:10.21203/rs.3.rs-6480393/v1), 2025-08-07
Supplement: Supplementary file 1 [file fc295b87c92356aa5777f56d.docx]

**Studies from Table 1**

| **Global CBF** |  |  |  |  |  |
| --- | --- | --- | --- | --- | --- |
| **Reference** | **Study participants** | **Prognostic Factor Measurement** | **Outcome measurement** | **Study Confounding** | **Statistical analysis &reporting** |
| **26.Owler et al 2004*67** | Low | Low | NA | Low | Low |
| **27.Bateman & Loiselle 200768** | Moderate | High | Moderate | Moderate | Moderate |
| **28.El Sankari et al 201169** | Moderate | Low | NA | Moderate | Moderate |
| **29.Yamada et al (2013)*70** | Moderate | High | NA | Moderate | Moderate |
| **30.Ziegelitz et al 2014 *71** | Low | Low | NA | Low | Moderate |
| **31.Qvarlander et al 201741** | Low | Low | NA | Low | Low |
| **32.Huang et al 202272** | Low | Moderate | NA | Low | Moderate |

**Table 2: Regional Cerebral Blood Flow at baseline including clinical correlations**

| **Reference** | **Study participants** | **Prognostic Factor Measurement** | **Outcome measurement** | **Study Confounding** | **Statistical analysis &reporting** |
| --- | --- | --- | --- | --- | --- |
| **8.Owler et al (2004a)**92***** | Low | Low | NA | Low | Low |
| **9.Momjian et al(2004)**93 | Low | Low | NA | Low | Low |
| **10.Sasaki et al (2007)**94 | Low | Moderate | NA | moderate | Moderate |
| **11.Klinge et al (2008)** 95 | High | Low | NA | moderate | Moderate |
| **12.Yoon et al (2009)**96 | High | High | NA | moderate | Moderate |
| **13.Takaya et al (2010)** 97 | Moderate | Low | NA | moderate | Moderate |
| **14. Ishii et al 2011** 98 | Low | High | NA | moderate | Low |
| **14. Ziegelitz et al 2014** 71 | Low | Low | NA | moderate | Moderate |
| **15.Virhammar**  **et al (2017)**99 | Low | High | NA | moderate | Low |
| **16. Takahashi et al (2019)** 100 | Moderate | Low | NA | Low | Low |
| **17. Azuma et al (2019)** 79 | Moderate | Low | Moderate | Moderate | Low |
| **18. Agerskov et al (2020)***101 | Moderate | Low | NA | moderate | Moderate |
| **19. Huang et al 2022** 72 | Low | Low | Low | moderate | Moderate |
| **20. Kang et al 2023** 102 | Moderate | Moderate | Low | Moderate | Moderate |

**Table 3. Results of Cerebral Metabolism studied either separately or simultaneously with Cerebral Blood Flow.**

| **Reference** | **Study participants** | **Prognostic Factor Measurement** | **Outcome measurement** | **Study Confounding** | **Statistical analysis &reporting** |
| --- | --- | --- | --- | --- | --- |
| 3.Miyamoto 2007a/b111,112 | Low | Low | NA | Low | Moderate |
| 4. Zhuang 2023 113 | Moderate | High | NA | Moderate | Moderate |
| 8.Calcagni 2013 118 | Moderate | Low | NA | Moderate | Moderate |
| 9.Townley 2018 119 | Moderate | Low | NA | Low | Low |
| 10.Miyazaki 2019 120 | Low | Low | NA | Low | Moderate |
| 11.Chiaravalloti 2020 121 | Low | Low | NA | Low | Moderate |
| 12.Agren-Wilsson 2003 124 | Low | Low | NA | Low | Low |
| 13.Eide 2010 122 | Low | Moderate | NA | moderate | Moderate |
| 14. Kizu et al 2001 125 | Moderate | Low | NA | moderate | Moderate |
| 15.Braun 2003 126 | Moderate | Moderate | NA | moderate | Moderate |
| 16.Shiino 2004 127 | High | Moderate | NA | moderate | Moderate |
| 17.Kubas 2006 128 | Low | Moderate | NA | moderate | Moderate |
| 18.Del Mar Matarin 2007 129 | Moderate | Low | NA | moderate | Moderate |
| 19.Lenfeldt 2008a 130 | Low | Low | NA | moderate | Moderate |
| 20.Algin 2010 131 | Moderate | Low | NA | Moderate | Moderate |
| 21.Lundin 2011/2013 132,133 | Low | Low | NA | Low | Moderate |

**Table 4. CBF before and after temporary CSF withdrawal.**

| **Ref** | **Study participants** | **Prognostic Factor Measurement** | **Outcome measurement** | **Study Confounding** | **Statistical analysis &reporting** |
| --- | --- | --- | --- | --- | --- |
| **1.Mori et al (2002)** 137 | High | Low | NA | Low | Moderate |
| **2.Hertel, Walter et al (2003)** 138 | Low | Low | NA | Low | Moderate |
| **3.Walter, Hertel et al (2005)** 139 | Low | Low | NA | Low | Moderate |
| **4.Dumarey et al (2005)** 140 | Moderate | Low | NA | Moderate | Moderate |
| **5.Virhammar et al (2014)** 141 | Low | Low | NA | Low | Low |

**Table 5. Global and regional CBF before & after shunting including correlation with outcome after shunting**

| **Reference** | **Study participants** | **Prognostic Factor Measurement** | **Outcome measurement** | **Study Confounding** | **Statistical analysis &reporting** |
| --- | --- | --- | --- | --- | --- |
| **15.** **Bakker et al 34(2002)**146 | Moderate | Moderate | Moderate | moderate | Moderate |
| **16.** **Klinge et al (2002)** 147 | Low | Low | Moderate | Low | Moderate |
| **17.** **Bateman & Loiselle (2007)** 68 | Moderate | Moderate | Moderate | Moderate | Moderate |
| **18.** **Ziegelitz et al (2016)** 148 | Low | High | Low | Low | Moderate |
| **19.** **Virhammar et al (2020)** 149 | Low | Low | Low | Low | Low |
| · **Regional CBF** |  |  |  |  |  |
| **27.** **Klinge et al (2002)** 151 | Low | Low | Moderate | moderate | Moderate |
| **28.** **Mataró et al (2003)** 152 | Low | High | Moderate | moderate | Moderate |
| **29.** **Tullberg et al (2004)** 153 | Low | Low | NA | Low | Low |
| **30.** **Murakami et al (2007)** 154 | Low | Moderate | Moderate | Low | Low |
| **31.** **Klinge et al (2008)** 155 | Low | Low | Moderate | Low | Low |
| 32. **Ishii et al (2011)** 98 | Low | High | Moderate | moderate | Moderate |
| 33. **Ziegelitz et al (2014)** 71 | Low | Moderate | Moderate | moderate | Moderate |
| 34. **Ziegelitz et al (2015)** 156 | Moderate | Moderate | Moderate | Moderate | Moderate |
| **35.** **Nocun et al 2015** 157 | High | High | Moderate | moderate | Moderate |
| **36.** **Ziegelitz et al (2016)** 148 | Low | High | Moderate | High | High |
| 37. **Tuniz et al (2017)** 158 | Moderate | Low | Moderate | moderate | Moderate |
| 38. **Azuma et al (2019)** 79 | Moderate | Moderate | Moderate | moderate | Moderate |
| **39.** **Agerskov et al (2020)*** 101 | Moderate | Moderate | Moderate | moderate | Moderate |
| 40. **Huang et al 2022** 72 | Moderate | Moderate | Moderate | moderate | Moderate |

**Table 6: Cerebrovascular reactivity & autoregulation: baseline**

| **Reference** | **Study participants** | **Prognostic Factor Measurement** | **Outcome measurement** | **Study Confounding** | **Statistical analysis &reporting** |  |
| --- | --- | --- | --- | --- | --- | --- |
| **Cerebrovascular reactivity** | | | | | |  |
| 7. **Chang et al (2003)** 167 | High | Moderate | NA | moderate | Moderate |  |
| 8. **Jarus-Dziedzic et al (2005)** 168 | High | Moderate | NA | moderate | Moderate |  |
| 9. **Yamada et al (2013)** 70 | Moderate | Low | NA | Low | Moderate |  |
| **Autoregulation** | | | | | |  |
| 12. **Czosnyka et al (2002)** 170 | Low | Moderate | NA | Moderate | Low |  |
| 13. **Owler et al (2004b)** 171 & 14. **Momjian et al (2004)** 93 (same patients) | Low | Low | NA | Low | Low |  |
| 15. **Czosnyka et al (2005)**172 | Low | Moderate | NA | Moderate | Low |  |
| 16. **Lalou et al (2018)**173 | Low | Moderate | NA | Low | Moderate |  |

**Table 7. Cerebrovascular reactivity pre and post shunt including correlation with outcome after shunting.**

| **Ref** | **Study participants** | **Prognostic Factor Measurement** | **Outcome measurement** | **Study Confounding** | **Statistical analysis &reporting** |
| --- | --- | --- | --- | --- | --- |
| 5. **Bakker et al (2002)** 180 | Low | High | Moderate | moderate | Moderate |
| 6. **Klinge et al (2002a-d)** 148,152,165,181 | Low | Moderate | Moderate | moderate | Moderate |
| 7. **Chang et al (2003)** 167 | Moderate | Moderate | Moderate | Moderate | Moderate |
| 8. **Chang et al (2003, 2009)** 167,182 | High | High | Moderate | moderate | Moderate |
| 9. **Yamada et al (2013)** 70 | Low | Low | Moderate | moderate | Moderate |

**Table 8. Predictive value of baseline global and regional CBF for outcome after shunting**

| **Reference** | **Study participants** | **Prognostic Factor Measurement** | **Outcome measurement** | **Study Confounding** | **Statistical analysis &reporting** |
| --- | --- | --- | --- | --- | --- |
| **Global CBF** | |  |  |  |  |
| 6. **Bateman et al (2007)**68 | Moderate | High | Moderate | Moderate | Moderate |
| **Regional CBF** | Moderate | Low | NA | Moderate | Moderate |
| 15. **Ishii et al (2011)** 98 | Moderate | High | NA | Moderate | Moderate |

**Table 9. Baseline cerebrovascular reactivity and autoregulation: predictive value**

| **Reference** | **Study participants** | **Prognostic Factor Measurement** | **Outcome measurement** | **Study Confounding** | **Statistical analysis &reporting** |
| --- | --- | --- | --- | --- | --- |
| 4. Klinge et al., 1999, 2002a ,2002b **(patient series)** 66,165,181 | Low | Low | Moderate | moderate | moderate |
| 5. **Chang et al (2003)** 185 | High | Moderate | Moderate | moderate | Moderate |
| 6. **Chen et al (2008)** 186 | Moderate | Low | Moderate | moderate | Moderate |
| 7. **Chang et al (2009)** 182 | High | Moderate | Moderate | moderate | Moderate |
| 8. **Yamada et al (2013)*** 70 | Moderate | Low | Moderate | Moderate | Moderate |
| **Global Autoregulation** |  |  |  |  |  |
| 9. **Lalou et al (2018)**173 | Low | Moderate | Moderate | Low | Moderate |
